# Supplementary material for: Heterologous Prime-Boost Regimens with a Recombinant Chimpanzee Adenoviral Vector and Adjuvanted F4 Protein Elicit Polyfunctional HIV-1-Specific T-Cell Responses in Macaques
Source: PubMed Central journal article supplement (PMC4391709; doi:10.1371/journal.pone.0122835), 2015-04-09
Supplement: pone.0122835.s001.pdf [file pone.0122835.s001.pdf]

**S1 Table. Geometric means and 95% confidence intervals of the HIV-1-specific CD4<sup>+</sup> T-cell responses in macaques**

| <b>GROUP</b> | <b>Week</b> | <b>Geomean (%)</b> | <b>Lower 95% CI (%)</b> | <b>Upper 95% CI (%)</b> |
|--------------|-------------|--------------------|-------------------------|-------------------------|
| AA           | 0           | 0.00889            | 0.00254                 | 0.03111                 |
| AA           | 2           | 0.04727            | 0.02642                 | 0.08458                 |
| AA           | 14          | 0.15763            | 0.10854                 | 0.22892                 |
| AA           | 24          | 0.08741            | 0.04753                 | 0.16075                 |
| AA           | 30          | 0.06477            | 0.0338                  | 0.12411                 |
| AAPP         | 0           | 0.0208             | 0.0068                  | 0.06365                 |
| AAPP         | 2           | 0.06766            | 0.03705                 | 0.12358                 |
| AAPP         | 14          | 0.06635            | 0.04655                 | 0.09456                 |
| AAPP         | 24          | 0.05196            | 0.02405                 | 0.11226                 |
| AAPP         | 28          | 0.26757            | 0.15793                 | 0.45335                 |
| AAPP         | 30          | 0.35748            | 0.2292                  | 0.55755                 |
| AAPP         | 40          | 0.16736            | 0.09945                 | 0.28164                 |
| AAPP         | 52          | 0.11073            | 0.05695                 | 0.21529                 |
| PP           | 0           | 0.02933            | 0.01385                 | 0.06213                 |
| PP           | 2           | 0.12599            | 0.05272                 | 0.30108                 |
| PP           | 6           | 0.40752            | 0.24236                 | 0.68523                 |
| PP           | 16          | 0.30154            | 0.18555                 | 0.49003                 |
| PP           | 28          | 0.15136            | 0.09562                 | 0.23958                 |
| PPAA         | 0           | 0.0336             | 0.01435                 | 0.07866                 |
| PPAA         | 2           | 0.13275            | 0.07462                 | 0.23617                 |
| PPAA         | 6           | 0.48092            | 0.23521                 | 0.98333                 |
| PPAA         | 16          | 0.19092            | 0.0752                  | 0.48467                 |
| PPAA         | 18          | 0.15035            | 0.01775                 | 1.27382                 |
| PPAA         | 30          | 0.26909            | 0.12636                 | 0.57305                 |
| PPAA         | 40          | 0.18636            | 0.10588                 | 0.328                   |
| PPAA         | 52          | 0.10859            | 0.04415                 | 0.26706                 |

Data relate to those presented in Figure 1A.
