# Supplementary material for: Heterologous Prime-Boost Regimens with a Recombinant Chimpanzee Adenoviral Vector and Adjuvanted F4 Protein Elicit Polyfunctional HIV-1-Specific T-Cell Responses in Macaques
Source: PubMed Central journal article supplement (PMC4391709; doi:10.1371/journal.pone.0122835), 2015-04-09
Supplement: pone.0122835.s002.pdf [file pone.0122835.s002.pdf]

S2 Table. Cytokine expression profiles of HIV-1-specific CD4<sup>+</sup> T-cell responses in individual macaques

| Group | Monkey ID no. | Frequencies per CD4 <sup>+</sup> T-cell phenotype (%)                   |                                                                         |                                                                         |                                                                         |                                                                         |                                                                         |                                                                         |
|-------|---------------|-------------------------------------------------------------------------|-------------------------------------------------------------------------|-------------------------------------------------------------------------|-------------------------------------------------------------------------|-------------------------------------------------------------------------|-------------------------------------------------------------------------|-------------------------------------------------------------------------|
|       |               | IL-2 <sup>+</sup> IFN- $\gamma$ <sup>-</sup> TNF- $\alpha$ <sup>-</sup> | IL-2 <sup>-</sup> IFN- $\gamma$ <sup>+</sup> TNF- $\alpha$ <sup>-</sup> | IL-2 <sup>-</sup> IFN- $\gamma$ <sup>-</sup> TNF- $\alpha$ <sup>+</sup> | IL-2 <sup>+</sup> IFN- $\gamma$ <sup>+</sup> TNF- $\alpha$ <sup>-</sup> | IL-2 <sup>+</sup> IFN- $\gamma$ <sup>-</sup> TNF- $\alpha$ <sup>+</sup> | IL-2 <sup>-</sup> IFN- $\gamma$ <sup>+</sup> TNF- $\alpha$ <sup>+</sup> | IL-2 <sup>+</sup> IFN- $\gamma$ <sup>+</sup> TNF- $\alpha$ <sup>+</sup> |
| AA    | 2             | 0.0317                                                                  | 0.0188                                                                  | 0.0012                                                                  | 0.0388                                                                  | 0                                                                       | 0                                                                       | 0.003                                                                   |
| AA    | 14            | 0.0381                                                                  | 0.0462                                                                  | 0.0097                                                                  | 0.0817                                                                  | 0.0153                                                                  | 0.0149                                                                  | 0.0461                                                                  |
| AA    | 18            | 0.011                                                                   | 0.0028                                                                  | 0.0151                                                                  | 0.0108                                                                  | 0.0108                                                                  | 0.0167                                                                  | 0.0224                                                                  |
| AA    | 20            | 0.014                                                                   | 0.0677                                                                  | 0.0273                                                                  | 0.0656                                                                  | 0.0209                                                                  | 0.0098                                                                  | 0.0634                                                                  |
| AA    | 30            | 0.0416                                                                  | 0.0202                                                                  | 0.005                                                                   | 0.0308                                                                  | 0.0282                                                                  | 0                                                                       | 0.0211                                                                  |
| AA    | 50            | 0.0487                                                                  | 0.028                                                                   | 0.0194                                                                  | 0.0647                                                                  | 0.0194                                                                  | 0.0021                                                                  | 0.0324                                                                  |
| AA    | 29            | 0.0305                                                                  | 0.022                                                                   | 0.0143                                                                  | 0.0244                                                                  | 0.0184                                                                  | 0.0124                                                                  | 0.0169                                                                  |
| AA    | 35            | 0.0153                                                                  | 0.0536                                                                  | 0                                                                       | 0.0757                                                                  | 0.0051                                                                  | 0.0077                                                                  | 0.0452                                                                  |
| PP    | 7             | 0.217                                                                   | 0.008                                                                   | 0.003                                                                   | 0.022                                                                   | 0.052                                                                   | 0                                                                       | 0.011                                                                   |
| PP    | 9             | 0.651                                                                   | 0.024                                                                   | 0.037                                                                   | 0.07                                                                    | 0.16                                                                    | 0.015                                                                   | 0.009                                                                   |
| PP    | 3             | 0.211                                                                   | 0                                                                       | 0.022                                                                   | 0.024                                                                   | 0.149                                                                   | 0                                                                       | 0.028                                                                   |
| PP    | 22            | 0.74                                                                    | 0                                                                       | 0.015                                                                   | 0.033                                                                   | 0.293                                                                   | 0                                                                       | 0.012                                                                   |
| PP    | 45            | 0.145                                                                   | 0.019                                                                   | 0.014                                                                   | 0.046                                                                   | 0.027                                                                   | 0.009                                                                   | 0.019                                                                   |
| PP    | 47            | 0.226                                                                   | 0                                                                       | 0.02                                                                    | 0.017                                                                   | 0.102                                                                   | 0.014                                                                   | 0.014                                                                   |
| PP    | 28            | 0.145                                                                   | 0.019                                                                   | 0.014                                                                   | 0.046                                                                   | 0.027                                                                   | 0.009                                                                   | 0.019                                                                   |
| PP    | 31            | 0.226                                                                   | 0                                                                       | 0.02                                                                    | 0.017                                                                   | 0.102                                                                   | 0.014                                                                   | 0.014                                                                   |
| PPAA  | 6             | 0.021                                                                   | 0.016                                                                   | 0                                                                       | 0.033                                                                   | 0.002                                                                   | 0.005                                                                   | 0.005                                                                   |
| PPAA  | 8             | 0                                                                       | 0                                                                       | 0                                                                       | 0.008                                                                   | 0.025                                                                   | 0.035                                                                   | 0.076                                                                   |
| PPAA  | 23            | 0.045                                                                   | 0.051                                                                   | 0.017                                                                   | 0.048                                                                   | 0.041                                                                   | 0.004                                                                   | 0.028                                                                   |
| PPAA  | 25            | 0.075                                                                   | 0.029                                                                   | 0.019                                                                   | 0.037                                                                   | 0.038                                                                   | 0.003                                                                   | 0.032                                                                   |
| PPAA  | 43            | 0.333                                                                   | 0.101                                                                   | 0.069                                                                   | 0.147                                                                   | 0.226                                                                   | 0.019                                                                   | 0.117                                                                   |
| PPAA  | 27            | 0.08                                                                    | 0.079                                                                   | 0.012                                                                   | 0.109                                                                   | 0.071                                                                   | 0.018                                                                   | 0.115                                                                   |
| PPAA  | 32            | 0.081                                                                   | 0.06                                                                    | 0.028                                                                   | 0.059                                                                   | 0.043                                                                   | 0.011                                                                   | 0.043                                                                   |
| AAPP  | 4             | 0.02                                                                    | 0.046                                                                   | 0                                                                       | 0.06                                                                    | 0.007                                                                   | 0                                                                       | 0.046                                                                   |
| AAPP  | 11            | 0.046                                                                   | 0.19                                                                    | 0                                                                       | 0.171                                                                   | 0.007                                                                   | 0.013                                                                   | 0.054                                                                   |
| AAPP  | 5             | 0.052                                                                   | 0.161                                                                   | 0.008                                                                   | 0.183                                                                   | 0.013                                                                   | 0.017                                                                   | 0.062                                                                   |
| AAPP  | 19            | 0.024                                                                   | 0.052                                                                   | 0.006                                                                   | 0.071                                                                   | 0.017                                                                   | 0.01                                                                    | 0.009                                                                   |
| AAPP  | 37            | 0.094                                                                   | 0.166                                                                   | 0.019                                                                   | 0.091                                                                   | 0.036                                                                   | 0.006                                                                   | 0.049                                                                   |
| AAPP  | 46            | 0.055                                                                   | 0.047                                                                   | 0.007                                                                   | 0.096                                                                   | 0.004                                                                   | 0.013                                                                   | 0.048                                                                   |
| AAPP  | 26            | 0.158                                                                   | 0.331                                                                   | 0.022                                                                   | 0.233                                                                   | 0.025                                                                   | 0.021                                                                   | 0.057                                                                   |
| AAPP  | 38            | 0.075                                                                   | 0.156                                                                   | 0.015                                                                   | 0.033                                                                   | 0.009                                                                   | 0.016                                                                   | 0.009                                                                   |

Data relate to those presented in Figure 1B.
