# Supplementary material for: Heterologous Prime-Boost Regimens with a Recombinant Chimpanzee Adenoviral Vector and Adjuvanted F4 Protein Elicit Polyfunctional HIV-1-Specific T-Cell Responses in Macaques
Source: PubMed Central journal article supplement (PMC4391709; doi:10.1371/journal.pone.0122835), 2015-04-09
Supplement: pone.0122835.s003.pdf [file pone.0122835.s003.pdf]

**S3 Table. Geometric means and 95% confidence intervals of the HIV-1-specific CD8<sup>+</sup> T-cell responses in macaques**

| <b>Group</b> | <b>Week</b> | <b>Geomean (%)</b> | <b>Lower 95% CI (%)</b> | <b>Upper 95% CI (%)</b> |
|--------------|-------------|--------------------|-------------------------|-------------------------|
| AA           | 0           | 0.01934            | 0.0055                  | 0.06794                 |
| AA           | 2           | 0.17462            | 0.0655                  | 0.4655                  |
| AA           | 14          | 0.51439            | 0.25519                 | 1.03687                 |
| AA           | 24          | 0.2454             | 0.12499                 | 0.48183                 |
| AA           | 30          | 0.12134            | 0.06328                 | 0.23267                 |
| AAPP         | 0           | 0.02324            | 0.0064                  | 0.08445                 |
| AAPP         | 2           | 0.1971             | 0.11539                 | 0.33665                 |
| AAPP         | 14          | 0.32537            | 0.15411                 | 0.68694                 |
| AAPP         | 24          | 0.18217            | 0.09748                 | 0.34042                 |
| AAPP         | 28          | 0.16364            | 0.0779                  | 0.34376                 |
| AAPP         | 30          | 0.17403            | 0.10753                 | 0.28166                 |
| AAPP         | 40          | 0.11017            | 0.05985                 | 0.20282                 |
| AAPP         | 52          | 0.0628             | 0.035                   | 0.11268                 |
| PP           | 0           | 0.0501             | 0.02872                 | 0.0874                  |
| PP           | 2           | 0.02753            | 0.01055                 | 0.07182                 |
| PP           | 6           | 0.04592            | 0.02869                 | 0.0735                  |
| PP           | 16          | 0.02262            | 0.00387                 | 0.13208                 |
| PP           | 28          | 0.02585            | 0.0106                  | 0.06302                 |
| PPAA         | 0           | 0.04447            | 0.01548                 | 0.12778                 |
| PPAA         | 2           | 0.04218            | 0.01451                 | 0.12262                 |
| PPAA         | 6           | 0.0391             | 0.01497                 | 0.10211                 |
| PPAA         | 16          | 0.03329            | 0.01348                 | 0.0822                  |
| PPAA         | 18          | 0.11181            | 0.04471                 | 0.27958                 |
| PPAA         | 30          | 0.43366            | 0.14476                 | 1.29913                 |
| PPAA         | 40          | 0.13914            | 0.04308                 | 0.44932                 |
| PPAA         | 52          | 0.09524            | 0.02856                 | 0.3176                  |

Data relate to those presented in Figure 2A.
