# Supplementary material for: Heterologous Prime-Boost Regimens with a Recombinant Chimpanzee Adenoviral Vector and Adjuvanted F4 Protein Elicit Polyfunctional HIV-1-Specific T-Cell Responses in Macaques
Source: PubMed Central journal article supplement (PMC4391709; doi:10.1371/journal.pone.0122835), 2015-04-09
Supplement: pone.0122835.s004.pdf [file pone.0122835.s004.pdf]

S4 Table. Cytokine expression profiles of HIV-1-specific CD8<sup>+</sup> T-cell responses in individual macaques

| Groupe | Monkey ID | Frequencies per CD8 <sup>+</sup> T-cell phenotype (%)   |                                                         |                                                         |                                                         |                                                         |                                                         |                                                         |
|--------|-----------|---------------------------------------------------------|---------------------------------------------------------|---------------------------------------------------------|---------------------------------------------------------|---------------------------------------------------------|---------------------------------------------------------|---------------------------------------------------------|
|        |           | IL-2 <sup>+</sup> IFN-γ <sup>-</sup> TNF-α <sup>-</sup> | IL-2 <sup>-</sup> IFN-γ <sup>+</sup> TNF-α <sup>-</sup> | IL-2 <sup>+</sup> IFN-γ <sup>-</sup> TNF-α <sup>+</sup> | IL-2 <sup>-</sup> IFN-γ <sup>+</sup> TNF-α <sup>-</sup> | IL-2 <sup>+</sup> IFN-γ <sup>-</sup> TNF-α <sup>+</sup> | IL-2 <sup>-</sup> IFN-γ <sup>+</sup> TNF-α <sup>+</sup> | IL-2 <sup>+</sup> IFN-γ <sup>+</sup> TNF-α <sup>+</sup> |
| AA     | 2         | 0.011276071                                             | 0.161907931                                             | 0.036083856                                             | 0.046847184                                             | 0.007722753                                             | 0.217297088                                             | 0.109587234                                             |
| AA     | 14        | 0                                                       | 0.216217899                                             | 0.030866414                                             | 0.004118276                                             | 0                                                       | 0.124701772                                             | 0.028765305                                             |
| AA     | 18        | 0.005151831                                             | 0.23178175                                              | 0.001052686                                             | 0.018492834                                             | 0.014952153                                             | 0.330392945                                             | 0.042137499                                             |
| AA     | 20        | 0.007806401                                             | 0.21614895                                              | 0.016047275                                             | 0                                                       | 0                                                       | 0.310104036                                             | 0.007821666                                             |
| AA     | 30        | 0.001596372                                             | 0.026521603                                             | 0.001186012                                             | 0.005068424                                             | 0.002658443                                             | 0.038566114                                             | 0.006247908                                             |
| AA     | 50        | 0                                                       | 0.411696669                                             | 0.036912227                                             | 0.00923386                                              | 0.004605324                                             | 0.274644799                                             | 0.054075142                                             |
| AA     | 29        | 0.026254111                                             | 0.340803997                                             | 0                                                       | 0.027828546                                             | 0                                                       | 0.174668096                                             | 0                                                       |
| AA     | 35        | 0.010473645                                             | 0.810145009                                             | 0.111783531                                             | 0.05223851                                              | 0.014128826                                             | 0.519462726                                             | 0.029204752                                             |
| PP     | 7         | 0.009592326                                             | 0.032326543                                             | 0                                                       | 0.009592326                                             | 0                                                       | 0.004796163                                             | 0                                                       |
| PP     | 9         | 0.008770391                                             | 0.015278546                                             | 0.026447116                                             | 0.003922531                                             | 0                                                       | 0.004385196                                             | 0.004385196                                             |
| PP     | 3         | 0.006438981                                             | 0.006438981                                             | 0.005674081                                             | 0                                                       | 0                                                       | 0.0026758                                               | 0.002350219                                             |
| PP     | 22        | 0.040468773                                             | 0.022166527                                             | 0.022211673                                             | 0.004589051                                             | 0.002294525                                             | 3.30E-05                                                | 0.002294525                                             |
| PP     | 45        | 0.001152312                                             | 0.009670765                                             | 0                                                       | 0.003773015                                             | 0                                                       | 0                                                       | 0.003773015                                             |
| PP     | 47        | 0                                                       | 0.0328526                                               | 0                                                       | 0.003725505                                             | 0                                                       | 0                                                       | 0                                                       |
| PP     | 28        | 0                                                       | 0.018504052                                             | 0.031183659                                             | 0.001602073                                             | 0                                                       | 0                                                       | 0                                                       |
| PP     | 31        | 0.00339075                                              | 0.016867421                                             | 0                                                       | 0                                                       | 0.005788377                                             | 0.039279134                                             | 0.007359216                                             |
| PPAA   | 6         | 0.008595496                                             | 0.824460004                                             | 0.020569557                                             | 0.017190992                                             | 0.008595496                                             | 0.152210964                                             | 0.008595496                                             |
| PPAA   | 8         | 0                                                       | 0.202519823                                             | 0.013218031                                             | 0                                                       | 0.001015667                                             | 0.192348792                                             | 0                                                       |
| PPAA   | 23        | 0                                                       | 0.060570521                                             | 0.019184352                                             | 0.002888737                                             | 0.008360305                                             | 0.041594499                                             | 0.01907213                                              |
| PPAA   | 25        | 0.012159083                                             | 0.030963076                                             | 0.003529858                                             | 0.028459229                                             | 0                                                       | 0.012545032                                             | 0.004787722                                             |
| PPAA   | 43        | 0.039892347                                             | 1.129232786                                             | 0.069540605                                             | 0.228314773                                             | 0.02418692                                              | 0.351551976                                             | 0.312232581                                             |
| PPAA   | 27        | 0.00453114                                              | 0.757442366                                             | 0.013630096                                             | 0.03968991                                              | 0.005238894                                             | 0.267998769                                             | 0.068930683                                             |
| PPAA   | 32        | 0.002782105                                             | 0.144959321                                             | 0                                                       | 0.032947187                                             | 0                                                       | 0.00554927                                              | 0.007574167                                             |
| AAPP   | 4         | 0.010191083                                             | 0.13561236                                              | 0                                                       | 0.027350014                                             | 0                                                       | 0.086730811                                             | 0.045859873                                             |
| AAPP   | 11        | 0                                                       | 0.143906893                                             | 0                                                       | 0.047949087                                             | 0                                                       | 0.113483286                                             | 0.065385118                                             |
| AAPP   | 5         | 0.002022156                                             | 0.174012014                                             | 0.008088623                                             | 0.034410681                                             | 0.008409419                                             | 0.067160538                                             | 0.034779683                                             |
| AAPP   | 19        | 0.000430449                                             | 0                                                       | 0.036295262                                             | 0.00048493                                              | 0.002877367                                             | 0.038470908                                             | 0.00842075                                              |
| AAPP   | 37        | 0                                                       | 0.042973786                                             | 0.043205253                                             | 0.012278225                                             | 0                                                       | 0.043031653                                             | 0                                                       |
| AAPP   | 46        | 0.007181821                                             | 0.061334245                                             | 0                                                       | 0.037487056                                             | 0.003464283                                             | 0.018954494                                             | 0.007181821                                             |
| AAPP   | 26        | 0.011746042                                             | 0.043801526                                             | 0.01916234                                              | 0                                                       | 0                                                       | 0.058240994                                             | 0.015042352                                             |
| AAPP   | 38        | 0.00805419                                              | 0.016899107                                             | 0.003433061                                             | 0.007829168                                             | 0                                                       | 0.052383579                                             | 0.002789712                                             |

Data relate to those presented in Figure 2B.
