# Supplementary material for: Heterologous Prime-Boost Regimens with a Recombinant Chimpanzee Adenoviral Vector and Adjuvanted F4 Protein Elicit Polyfunctional HIV-1-Specific T-Cell Responses in Macaques
Source: PubMed Central journal article supplement (PMC4391709; doi:10.1371/journal.pone.0122835), 2015-04-09
Supplement: pone.0122835.s005.pdf [file pone.0122835.s005.pdf]

**S5 Table. HIV-1 antigens targeted by CD4<sup>+</sup> and CD8<sup>+</sup> T-cell responses in individual macaques at 2 weeks post last immunization**

| Group | Monkey ID | Stimulation | CD4 <sup>+</sup> T cells (%) | CD8 <sup>+</sup> T cells (%) |
|-------|-----------|-------------|------------------------------|------------------------------|
| AA    | 2         | Nef         | 0.11703                      | 0.207544331                  |
| AA    | 2         | P17         | 0.03775                      | 0.084387352                  |
| AA    | 2         | P24         | 0.06253                      | 0.040762626                  |
| AA    | 2         | RT          | 0.10840                      | 0.428585014                  |
| AA    | 14        | Nef         | 0.04141                      | 0.200626705                  |
| AA    | 14        | P17         | 0.03766                      | 0.064477864                  |
| AA    | 14        | P24         | 0.03803                      | 0.004179454                  |
| AA    | 14        | RT          | 0.15065                      | 0.256598825                  |
| AA    | 18        | Nef         | 0.08747                      | 0                            |
| AA    | 18        | P17         | 0.06310                      | 0.040063773                  |
| AA    | 18        | P24         | 0.04140                      | 0.106747099                  |
| AA    | 18        | RT          | 0.14974                      | 0.679635407                  |
| AA    | 20        | Nef         | 0.01913                      | 0.023573152                  |
| AA    | 20        | P17         | 0.04449                      | 0.066263552                  |
| AA    | 20        | P24         | 0.07108                      | 0.022563177                  |
| AA    | 20        | RT          | 0.03183                      | 0.508304854                  |
| AA    | 29        | Nef         | 0.04785                      | 0.067579239                  |
| AA    | 29        | P17         | 0.04815                      | 0.064438085                  |
| AA    | 29        | P24         | 0.11628                      | 0.458740674                  |
| AA    | 29        | RT          | 0.10369                      | 0.57342916                   |
| AA    | 30        | Nef         | 0.07685                      | 0.030792936                  |
| AA    | 30        | P17         | 0.01891                      | 0.03252548                   |
| AA    | 30        | P24         | 0.07017                      | 0.03215072                   |
| AA    | 30        | RT          | 0.10487                      | 0.082143495                  |
| AA    | 35        | Nef         | 0.03206                      | 0.045569765                  |
| AA    | 35        | P17         | 0.03563                      | 0.08604539                   |
| AA    | 35        | P24         | 0.04389                      | 0.158911903                  |
| AA    | 35        | RT          | 0.08003                      | 1.39011396                   |
| AA    | 50        | Nef         | 0.05222                      | 0.10180572                   |
| AA    | 50        | P17         | 0.03980                      | 0.025046447                  |
| AA    | 50        | P24         | 0.05414                      | 0.164251786                  |
| AA    | 50        | RT          | 0.05441                      | 0.225561891                  |
| PP    | 3         | Nef         | 0.10952                      | 0.024319473                  |
| PP    | 3         | P17         | 0.13705                      | 0.012847842                  |
| PP    | 3         | P24         | 0.18803                      | 0.031530476                  |
| PP    | 3         | RT          | 0.22564                      | 0.036511224                  |
| PP    | 7         | Nef         | 0.01987                      | 0.040078486                  |
| PP    | 7         | P17         | 0.03349                      | 0.018818212                  |
| PP    | 7         | P24         | 0.10423                      | 0.026766232                  |
| PP    | 7         | RT          | 0.06205                      | 0.038385312                  |
| PP    | 9         | Nef         | 0.16364                      | 0.057700539                  |
| PP    | 9         | P17         | 0.13463                      | 0.061465461                  |
| PP    | 9         | P24         | 0.29834                      | 0.060523596                  |
| PP    | 9         | RT          | 0.41211                      | 0.047737625                  |
| PP    | 22        | Nef         | 0.16512                      | 0.11562704                   |
| PP    | 22        | P17         | 0.07990                      | 0.138150638                  |

| Group | Monkey ID | Stimulation | CD4 <sup>+</sup> T cells (%) | CD8 <sup>+</sup> T cells (%) |
|-------|-----------|-------------|------------------------------|------------------------------|
| PP    | 22        | P24         | 0.34592                      | 0.062051182                  |
| PP    | 22        | RT          | 0.69501                      | 0.066600938                  |
| PP    | 28        | Nef         | 0.10027                      | 0.066759509                  |
| PP    | 28        | P17         | 0.06782                      | 0.109465699                  |
| PP    | 28        | P24         | 0.18584                      | 0.047509806                  |
| PP    | 28        | RT          | 0.23600                      | 0.060469297                  |
| PP    | 31        | Nef         | 0.01664                      | 0.107124522                  |
| PP    | 31        | P17         | 0.00716                      | 0.05645492                   |
| PP    | 31        | P24         | 0.02214                      | 0.04453301                   |
| PP    | 31        | RT          | 0.11829                      | 0.153718711                  |
| PP    | 45        | Nef         | 0.08644                      | 0.100378322                  |
| PP    | 45        | P17         | 0.04239                      | 0.022407947                  |
| PP    | 45        | P24         | 0.15119                      | 0.094640705                  |
| PP    | 45        | RT          | 0.20014                      | 0.006129642                  |
| PP    | 47        | Nef         | 0.08732                      | 0.040459835                  |
| PP    | 47        | P17         | 0.06648                      | 0.043703969                  |
| PP    | 47        | P24         | 0.02483                      | 0.059242227                  |
| PP    | 47        | RT          | 0.35316                      | 0.05325612                   |
| PPAA  | 6         | Nef         | 0.02584                      | 0.05982463                   |
| PPAA  | 6         | P17         | 0.00205                      | 0.088315252                  |
| PPAA  | 6         | P24         | 0.04140                      | 0.09499487                   |
| PPAA  | 6         | RT          | 0.03148                      | 1.009013947                  |
| PPAA  | 8         | Nef         | 0.03346                      | 0.033750418                  |
| PPAA  | 8         | P17         | 0.01809                      | 0.046224681                  |
| PPAA  | 8         | P24         | 0.02094                      | 0.084744597                  |
| PPAA  | 8         | RT          | 0.28522                      | 0.263624921                  |
| PPAA  | 23        | Nef         | 0.03176                      | 0.047378192                  |
| PPAA  | 23        | P17         | 0.01690                      | 0.026922025                  |
| PPAA  | 23        | P24         | 0.03235                      | 0.077136676                  |
| PPAA  | 23        | RT          | 0.14576                      | 0.049470116                  |
| PPAA  | 25        | Nef         | 0.03801                      | 0.020827638                  |
| PPAA  | 25        | P17         | 0.01030                      | 0.020425217                  |
| PPAA  | 25        | P24         | 0.04014                      | 0.008270028                  |
| PPAA  | 25        | RT          | 0.19740                      | 0.074672567                  |
| PPAA  | 27        | Nef         | 0.04388                      | 0.888863201                  |
| PPAA  | 27        | P17         | 0.04048                      | 0.034854546                  |
| PPAA  | 27        | P24         | 0.05757                      | 0.196576945                  |
| PPAA  | 27        | RT          | 0.37547                      | 0.06445538                   |
| PPAA  | 32        | Nef         | 0.06721                      | 0.109340593                  |
| PPAA  | 32        | P17         | 0.04912                      | 0.080651724                  |
| PPAA  | 32        | P24         | 0.05402                      | 0.044137196                  |
| PPAA  | 32        | RT          | 0.24321                      | 0.190504271                  |
| PPAA  | 42        | Nef         | #N/A                         | #N/A                         |
| PPAA  | 42        | P17         | #N/A                         | #N/A                         |
| PPAA  | 42        | P24         | #N/A                         | #N/A                         |
| PPAA  | 42        | RT          | #N/A                         | #N/A                         |
| PPAA  | 43        | Nef         | 0.27482                      | 0.217722302                  |
| PPAA  | 43        | P17         | 0.07257                      | 0.55068248                   |
| PPAA  | 43        | P24         | 0.09386                      | 0.047583483                  |

| Group | Monkey ID | Stimulation | CD4 <sup>+</sup> T cells (%) | CD8 <sup>+</sup> T cells (%) |
|-------|-----------|-------------|------------------------------|------------------------------|
| PPAA  | 43        | RT          | 0.59775                      | 0.726487835                  |
| AAPP  | 4         | Nef         | 0.04593                      | 0.214139273                  |
| AAPP  | 4         | P17         | 0.00050                      | 0.116405405                  |
| AAPP  | 4         | P24         | 0.01726                      | 0.136531192                  |
| AAPP  | 4         | RT          | 0.07188                      | 0.286162635                  |
| AAPP  | 5         | Nef         | 0.05043                      | 0.012268755                  |
| AAPP  | 5         | P17         | 0.08544                      | 0.01053013                   |
| AAPP  | 5         | P24         | 0.11632                      | 0.03396072                   |
| AAPP  | 5         | RT          | 0.37287                      | 0.29747013                   |
| AAPP  | 11        | Nef         | 0.01872                      | 0.165927997                  |
| AAPP  | 11        | P17         | 0.12731                      | 0.095499404                  |
| AAPP  | 11        | P24         | 0.16384                      | 0.013197629                  |
| AAPP  | 11        | RT          | 0.24956                      | 0.079551966                  |
| AAPP  | 19        | Nef         | 0.01921                      | 0.071275011                  |
| AAPP  | 19        | P17         | 0.04248                      | 0.078495174                  |
| AAPP  | 19        | P24         | 0.02667                      | 0.059934302                  |
| AAPP  | 19        | RT          | 0.10093                      | 0.071317769                  |
| AAPP  | 26        | Nef         | 0.12505                      | 0.06638162                   |
| AAPP  | 26        | P17         | 0.04054                      | 0.042968612                  |
| AAPP  | 26        | P24         | 0.10970                      | 0.085281787                  |
| AAPP  | 26        | RT          | 0.56583                      | 0.066471356                  |
| AAPP  | 37        | Nef         | 0.04483                      | 0.042809148                  |
| AAPP  | 37        | P17         | 0.08220                      | 0.061393038                  |
| AAPP  | 37        | P24         | 0.09615                      | 0.07325863                   |
| AAPP  | 37        | RT          | 0.12296                      | 0.099910263                  |
| AAPP  | 38        | Nef         | 0.05088                      | 0.030905398                  |
| AAPP  | 38        | P17         | 0.05808                      | 0.038429069                  |
| AAPP  | 38        | P24         | 0.31578                      | 0.053021438                  |
| AAPP  | 38        | RT          | 0.15383                      | 0.072893612                  |
| AAPP  | 46        | Nef         | 0.04263                      | 0.007662888                  |
| AAPP  | 46        | P17         | 0.01809                      | 0.02093344                   |
| AAPP  | 46        | P24         | 0.09339                      | 0.005644137                  |
| AAPP  | 46        | RT          | 0.22992                      | 0.107924793                  |

Data relate to those presented in Figure 3.
