# Supplementary material for: Heterologous Prime-Boost Regimens with a Recombinant Chimpanzee Adenoviral Vector and Adjuvanted F4 Protein Elicit Polyfunctional HIV-1-Specific T-Cell Responses in Macaques
Source: PubMed Central journal article supplement (PMC4391709; doi:10.1371/journal.pone.0122835), 2015-04-09
Supplement: pone.0122835.s007.pdf [file pone.0122835.s007.pdf]

**S7 Table. Phenotype of memory HIV-1-specific T cells CD8<sup>+</sup> T cells in individual macaques at 6 months post last immunization**

| Group | Monkey ID no. | Timing  | Stimulation | Memory population | Frequency           |                              |                                                |
|-------|---------------|---------|-------------|-------------------|---------------------|------------------------------|------------------------------------------------|
|       |               |         |             |                   | % IL-2 <sup>+</sup> | % INF- $\gamma$ <sup>+</sup> | % INF- $\gamma$ <sup>+</sup> IL-2 <sup>+</sup> |
| AA    | 35            | 180dpIV | Pool F4     | EM                | 0.000               | 0.026                        | 0.000                                          |
|       |               |         |             | CM                | 0.020               | 0.054                        | 0.014                                          |
| AA    | 2             | 180dpIV | Pool F4     | EM                | 0.020               | 0.085                        | 0.000                                          |
|       |               |         |             | CM                | 0.011               | 0.265                        | 0.080                                          |
| AA    | 50            | 180dpII | Pool F4     | EM                | 0.000               | 0.040                        | 0.000                                          |
|       |               |         |             | CM                | 0.000               | 0.063                        | 0.023                                          |
| AA    | 29            | 180dpII | Pool F4     | EM                | 0.000               | 0.093                        | 0.000                                          |
|       |               |         |             | CM                | 0.000               | 0.021                        | 0.000                                          |
| AA    | 18            | 180dpII | Pool F4     | EM                | 0.054               | 0.161                        | 0.011                                          |
|       |               |         |             | CM                | 0.053               | 0.064                        | 0.011                                          |
| AA    | 20            | 180dpII | Pool F4     | EM                | 0.022               | 0.043                        | 0.011                                          |
|       |               |         |             | CM                | 0.000               | 0.078                        | 0.000                                          |
| AA    | 30            | 180dpII | Pool F4     | EM                | 0.000               | 0.000                        | 0.000                                          |
|       |               |         |             | CM                | 0.000               | 0.019                        | 0.000                                          |
| AA    | 14            | 180dpII | Pool F4     | EM                | 0.000               | 0.132                        | 0.006                                          |
|       |               |         |             | CM                | 0.000               | 0.088                        | 0.019                                          |
| PPAA  | 43            | 180dpIV | Pool F4     | EM                | 0.000               | 0.169                        | 0.011                                          |
|       |               |         |             | CM                | 0.000               | 0.358                        | 0.011                                          |
| PPAA  | 27            | 180dpIV | Pool F4     | EM                | 0.000               | 0.362                        | 0.035                                          |
|       |               |         |             | CM                | 0.000               | 0.219                        | 0.023                                          |
| PPAA  | 25            | 180dpIV | Pool F4     | EM                | 0.000               | 0.002                        | 0.000                                          |
|       |               |         |             | CM                | 0.000               | 0.000                        | 0.000                                          |
| PPAA  | 23            | 180dpII | Pool F4     | EM                | 0.038               | 0.000                        | 0.000                                          |
|       |               |         |             | CM                | 0.000               | 0.000                        | 0.046                                          |
| PPAA  | 8             | 180dpII | Pool F4     | EM                | 0.000               | 0.048                        | 0.000                                          |
|       |               |         |             | CM                | 0.000               | 0.005                        | 0.011                                          |
| PPAA  | 6             | 180dpII | Pool F4     | EM                | 0.033               | 0.068                        | 0.070                                          |
|       |               |         |             | CM                | 0.000               | 0.000                        | 0.000                                          |
| PPAA  | 32            | 180dpII | Pool F4     | EM                | 0.010               | 0.000                        | 0.003                                          |
|       |               |         |             | CM                | 0.023               | 0.332                        | 0.060                                          |
| AAPP  | 37            | 180dpIV | Pool F4     | EM                | 0.017               | 0.077                        | 0.000                                          |
|       |               |         |             | CM                | 0.000               | 0.000                        | 0.000                                          |
| AAPP  | 38            | 180dpIV | Pool F4     | EM                | 0.011               | 0.149                        | 0.011                                          |
|       |               |         |             | CM                | 0.011               | 0.124                        | 0.022                                          |
| AAPP  | 26            | 180dpIV | Pool F4     | EM                | 0.010               | 0.000                        | 0.000                                          |
|       |               |         |             | CM                | 0.011               | 0.042                        | 0.000                                          |
| AAPP  | 4             | 180dpII | Pool F4     | EM                | 0.000               | 0.000                        | 0.000                                          |
|       |               |         |             | CM                | 0.000               | 0.000                        | 0.021                                          |
| AAPP  | 11            | 180dpII | Pool F4     | EM                | 0.000               | 0.059                        | 0.013                                          |
|       |               |         |             | CM                | 0.000               | 0.093                        | 0.073                                          |
| AAPP  | 5             | 180dpII | Pool F4     | EM                | 0.000               | 0.096                        | 0.000                                          |
|       |               |         |             | CM                | 0.000               | 0.056                        | 0.016                                          |
| AAPP  | 19            | 180dpII | Pool F4     | EM                | 0.023               | 0.000                        | 0.007                                          |
|       |               |         |             | CM                | 0.047               | 0.050                        | 0.016                                          |
| AAPP  | 46            | 180dpII | Pool F4     | EM                | 0.027               | 0.005                        | 0.007                                          |
|       |               |         |             | CM                | 0.126               | 0.021                        | 0.038                                          |
| PP    | 31            | 180dpIV | Pool F4     | EM                | 0.000               | 0.000                        | 0.012                                          |
|       |               |         |             | CM                | 0.002               | 0.000                        | 0.000                                          |
| PP    | 28            | 180dpIV | Pool F4     | EM                | 0.000               | 0.033                        | 0.000                                          |
|       |               |         |             | CM                | 0.000               | 0.000                        | 0.000                                          |
| PP    | 22            | 180dpII | Pool F4     | EM                | 0.000               | 0.000                        | 0.000                                          |
|       |               |         |             | CM                | 0.006               | 0.000                        | 0.000                                          |
| PP    | 3             | 180dpII | Pool F4     | EM                | 0.000               | 0.000                        | 0.007                                          |
|       |               |         |             | CM                | 0.000               | 0.000                        | 0.000                                          |
| PP    | 9             | 180dpII | Pool F4     | EM                | 0.002               | 0.016                        | 0.006                                          |
|       |               |         |             | CM                | 0.006               | 0.005                        | 0.000                                          |
| PP    | 7             | 180dpII | Pool F4     | EM                | 0.001               | 0.000                        | 0.018                                          |
|       |               |         |             | CM                | 0.027               | 0.000                        | 0.009                                          |
| PP    | 45            | 180dpII | Pool F4     | EM                | 0.044               | 0.000                        | 0.000                                          |
|       |               |         |             | CM                | 0.000               | 0.044                        | 0.000                                          |
| PP    | 47            | 180dpII | Pool F4     | EM                | 0.000               | 0.000                        | 0.000                                          |
|       |               |         |             | CM                | 0.000               | 0.000                        | 0.000                                          |

Data relate to those presented in Figure 4B.
