# Supplementary material for: Heterologous Prime-Boost Regimens with a Recombinant Chimpanzee Adenoviral Vector and Adjuvanted F4 Protein Elicit Polyfunctional HIV-1-Specific T-Cell Responses in Macaques
Source: PubMed Central journal article supplement (PMC4391709; doi:10.1371/journal.pone.0122835), 2015-04-09
Supplement: pone.0122835.s008.pdf [file pone.0122835.s008.pdf]

**S8 Table. Humoral responses against the F4 antigen in individual macaques**

| Group | Monkey ID no. | Titer |          |       |       |        |
|-------|---------------|-------|----------|-------|-------|--------|
|       |               | Pre   | 14/16 pl | 13pII | 83pII | 167pII |
| AA    | 2             | 500   | 500      | 9203  | 615   | 770    |
| AA    | 14            | 500   | 500      | 18886 | 828   | 1079   |
| AA    | 18            | 500   | 500      | 11238 | 500   | 500    |
| AA    | 20            | 500   | 500      | 500   | 500   | 500    |
| AA    | 30            | 500   | 500      | 12758 | 1097  | 1325   |
| AA    | 50            | 500   | 500      | 11116 | 827   | 500    |
| AA    | 29            | 500   | 500      | 11322 | 1102  | 947    |
| AA    | 35            | 500   | 500      | 6016  | 500   | 500    |

| Group | Monkey ID no. | Pre | 14/16 pl | 14pII | 84pII | 168pII |
|-------|---------------|-----|----------|-------|-------|--------|
| PP    | 7             | 500 | 500      | 24811 | 1059  | 1685   |
| PP    | 9             | 500 | 2761     | 58460 | 4728  | 6499   |
| PP    | 3             | 500 | 500      | 44164 | 1434  | 1658   |
| PP    | 22            | 500 | 500      | 54921 | 3100  | 3215   |
| PP    | 45            | 500 | 1362     | 52019 | 4930  | 5921   |
| PP    | 47            | 500 | 500      | 15597 | 1853  | 1328   |
| PP    | 28            | 500 | 920      | 27901 | 2825  | 3773   |
| PP    | 31            | 500 | 500      | 6610  | 519   | 500    |

| Group | Monkey ID no. | Pre | 14/16 pl | 13pII | 83pII | 13pIII | 13pIV | 84pIV | 197pIV |
|-------|---------------|-----|----------|-------|-------|--------|-------|-------|--------|
| AAPP  | 4             | 500 | 500      | 2911  | 500   | 52224  | 73994 | 2830  | 1326   |
| AAPP  | 11            | 500 | 500      | 5602  | 500   | 103670 | 64322 | 4502  | 2450   |
| AAPP  | 5             | 500 | 500      | 18620 | 500   | 71004  | 70431 | 5403  | 2906   |
| AAPP  | 19            | 500 | 500      | 6027  | 603   | 40995  | 47181 | 2223  | 1270   |
| AAPP  | 37            | 500 | 500      | 9528  | 804   | 31800  | 54919 | 5880  | 3545   |
| AAPP  | 46            | 500 | 500      | 19777 | 679   | 45765  | 35311 | 2481  | 1483   |
| AAPP  | 26            | 500 | 500      | 3396  | 500   | 66485  | 69515 | 4462  | 5759   |
| AAPP  | 38            | 500 | 500      | 5682  | 1825  | 53672  | 63909 | 4156  | 2398   |

| Group | Monkey ID no. | Pre | 14/16 pl | 14pII  | 84pII | 13pIII | 13pIV | 82pIV | 167pIV |
|-------|---------------|-----|----------|--------|-------|--------|-------|-------|--------|
| PPAA  | 6             | 500 | 2024     | 86436  | 7641  | 68115  | 23965 | 11199 | 9369   |
| PPAA  | 8             | 500 | 500      | 40159  | 3991  | 62606  | 19525 | 9524  | 8550   |
| PPAA  | 23            | 500 | 1756     | 75747  | 7229  | 161625 | 46610 | 20371 | 23157  |
| PPAA  | 25            | 500 | 1264     | 80518  | 7820  | 122323 | 51392 | 14964 | 10210  |
| PPAA  | 42            | 500 | 1003     | 64841  | #N/A  | #N/A   | #N/A  | #N/A  | #N/A   |
| PPAA  | 43            | 500 | 729      | 39534  | 3292  | 47333  | 55030 | 15641 | 11230  |
| PPAA  | 27            | 500 | 644      | 29438  | 2164  | 112262 | 43220 | 14453 | 8438   |
| PPAA  | 32            | 500 | 4551     | 118867 | 13798 | 96099  | 26544 | 11692 | 7918   |

Data relate to those presented in Figure 5.
